1 **Sugar Signaling Induces Dynamic Changes during Meristem Development in**  
2 **Arabidopsis**

3 Magdalena Musialak-Lange<sup>1</sup>, Katharina Fiddeke<sup>1,†,#</sup>, Annika Franke<sup>1,†,#</sup>, Friedrich Kragler<sup>1</sup>,  
4 Christin Abel<sup>1</sup>, and Vanessa Wahl<sup>1,\*</sup>

5 **Affiliations:**

6 <sup>1</sup>Max Planck Institute of Molecular Plant Physiology, Department of Metabolic Networks, Am  
7 Mühlenberg 1, Potsdam, 14476, Germany.

8 <sup>†</sup>Current work addresses: ProBioGen AG, Herbert-Bayer-Str. 8, 13086 Berlin (K.F.) and Takeda  
9 GmbH, Lehnizstra. 70-98, 16515 Oranienburg (A.F.)

10 <sup>#</sup>K.F. and A.F. contributed equally

11 <sup>\*</sup>Correspondence to: [vanessa.wahl@mpimp-golm.mpg.de](mailto:vanessa.wahl@mpimp-golm.mpg.de).

12 **One Sentence Summary:**

13 The increase in meristem size during the floral transition is regulated via a feedback regulation  
14 involving sugar signaling.

15           Aerial parts of plants originate from pluripotent cells in the shoot apical meristem  
16 (SAM). This population of stem cells is maintained via a negative feedback loop involving stable  
17 expression of *WUSCHEL* (*WUS*) and *CLAVATA3*. SAM size is dynamic and undergoes a more than  
18 2-fold expansion upon the transition to reproductive growth. The underlying mechanism  
19 controlling this process is largely unknown, but coinciding increased levels of trehalose 6-  
20 phosphate (T6P) suggest a participation of sugar signaling. Here we show that *TREHALOSE*  
21 *PHOSPHATE PHOSPHATASE J*, a component of the T6P pathway, is directly regulated by *WUS*,  
22 and controls SAM expansion at floral transition through *WUS*. Our findings demonstrate a  
23 dynamic feedback-regulation between central meristem maintenance and flowering time  
24 regulators with sugar signaling.

25           During the floral transition the *Arabidopsis thaliana* SAM undergoes a dramatic increase  
26 in size<sup>1</sup> (Fig. 1a). Since the transition between developmental stages requires a massive  
27 reorganization of organ development and sufficient energy, it is tightly controlled by  
28 environmental conditions and availability of nutrients<sup>2-5</sup>. Hence, plant development as a whole  
29 and SAM maintenance in particular demands continuous cross talk between its regulatory  
30 processes and the available resources. The sugar phosphate, trehalose 6-phosphate (T6P), serves  
31 as a signal for sucrose availability, which is conveyed to downstream metabolic and growth  
32 responses through a still largely unknown mechanism<sup>6</sup>. Also knowledge on the underlying  
33 mechanism controlling the morphological processes at the SAM at floral transition is scarce.  
34 However, increased levels of T6P coincide with the floral transition and the T6P pathway  
35 induces flowering by regulating key flowering genes expressed in leaves and the SAM<sup>4</sup>, which  
36 suggests a participation of sugar signaling in regulating the SAM size changes throughout the  
37 floral transition.

38           To assess whether the morphological changes at the SAM involve the T6P pathway, we  
39 investigated the effect on SAM architecture by decreasing *TPSI*, coding for the T6P synthesizing  
40 enzyme, by the means of an artificial microRNA also in the SAM proper (*35S:amiRTPSI*, Fig.  
41 S1). We compared these lines with plants with increased *TPSI* in the central zone (*CLV3:TPSI*,  
42 Fig. S2). These have smaller and bigger vegetative and reproductive meristems (Fig. 1b, 1c),  
43 resulting in smaller and bigger plants, respectively<sup>4</sup>. The homeodomain transcription factor *WUS*  
44 and the signaling peptide *CLV3* non-cell autonomously contribute to communication of position-  
45 dependent properties among SAM cells in a negative feedback loop and maintain the SAM cell  
46 population<sup>7</sup>. We therefore analyzed their expression in the SAM with altered *TPSI*. While the  
47 expression of *WUS* in the organizing centre (OC) and *CLV3* in the central zone (CZ) harboring

48 the stem cells are considered mutually exclusive<sup>7</sup>, we found reduced *TPSI* levels  
49 (*35S:amiRTPSI*) lead to an enlarged OC domain marked by *WUS* (Fig. 1d) that overlaps with the  
50 CZ, marked by *CLV3* expression (Fig. 1D). Plants overexpressing *TPSI* (*35S:TPSI*, Fig. S2)  
51 display an increased stem cell pool with otherwise little effect on *WUS* expression (Fig. 1d).  
52 However, the size of the CZ decreases in plants expressing *TPSI* under the *CLV3* promoter (Fig.  
53 1d, Fig. S2), indicating a smaller stem cell pool in support of a much smaller SAM size  
54 phenotype (Fig. 1d) of the very early flowering *CLV3:TPSI* plants<sup>4</sup>. The expression of  
55 *HISTONE4*, *CYCLIN D3;1* and *CYCLIN-DEPENDENT KINASE2;1*, three cell cycle marker  
56 genes (Fig. S3), suggests a higher proliferation rate and an increased number of cells displaced  
57 from the CZ to adopt organ-specific cell fates at the periphery as a plausible reason for the  
58 decreased SAM size of *CLV3:TPSI* and *vice versa* increased SAM size of *35S:amiRTPSI* plants  
59 (Fig. 1b, 1c).

60 To assess whether the *WUS/CLV* feedback loop can uncouple in a wild-type SAM  
61 during normal growth, we analyzed *WUS* and *CLV3* expression in wild-type plants in a time  
62 series spanning the floral transition (Fig. 1e). Throughout the vegetative phase SAM size  
63 gradually increases due to rising cell numbers (Fig. 1a; Fig. S4)<sup>8</sup>, reaching its maximum at the  
64 floral transition, independent of whether the plants are grown in continuous long days (LD) (Fig.  
65 1a) or in short days (SD) followed by a transfer to LD (Fig. S5). An enlarging SAM at the floral  
66 transition correlates with a larger *WUS* expression domain expanding into the CZ and the outer  
67 cell layer (L1) (Fig. 1e-g). This is supported by larger meristems of the *35S:amiRTPSI* line,  
68 which express *WUS* in the central zone (Fig. 1d). This observation is also consistent with  
69 massive proliferation of meristematic cells detected when *WUS* is expressed from a *CLV3*  
70 promoter in the CZ that resulted in meristems, no longer producing organs<sup>9</sup>. The presence of

71 *WUS* transcript in the outer meristem layers might be explained by a transient cytokinin signal in  
72 L1, which induces *WUS* and was reported to respond to carbon in seedlings<sup>10-12</sup>. However,  
73 cytokinin levels seem not to be altered in the L1 layer of cells as indicated by the synthetic  
74 cytokinin reporter *TCSn::GFP*<sup>13</sup> (Fig. S6). Further, while *WUS* expands to L1 for a short period  
75 (8-10 DAG), the *CLV3* expression domain remains expanded post floral transition (Fig. 1e, 1h).  
76 This suggests a transient uncoupling, which is re-established at the reproductive SAM (16 DAG),  
77 resembling earlier vegetative SAM expression patterns (6 DAG) (Fig. 1e), allowing organ  
78 production to resume.

79 To understand how the T6P pathway might control this process, we first analyzed  
80 expression of the ten genes encoding TREHALOSE PHOSPHATE PHOSPHATASEs (TPP)<sup>6</sup>.  
81 Except for *TPPC* and *TPPD*, which are expressed below detection limit, all were expressed in  
82 distinct SAM domains (Fig. S7). *TPPJ* strongly increases in the enlarged SAM of *clv3-7* due to  
83 an ectopic expression in L1 and L2 (Fig. 2a-c, Fig. S8, S9). Notably, in *clv3-7* and *clv3-10*  
84 mutants high levels of *WUS* in the outer SAM layers (Fig S9)<sup>14</sup> coincides with ectopic expression  
85 of *TPPJ* (Fig. S9). To assess whether ectopic expression of *TPPJ* contributes to the enlarged  
86 SAM of the *clv3* mutant, we next overexpressed *TPPJ* (*35S::TPPJ*, Fig. 2d). This results in  
87 significantly enlarged SAMs (Fig. 2e), and importantly, expands the *WUS* expression domain  
88 into L1 (Fig. 2f), consistent with our finding in wild-type plants at the floral transition (Fig. 1e).

89 Overlapping expression domains of ectopic *TPPJ* (Fig. 2b) and *WUS* in the *clv3* mutant  
90 SAM implies a direct influence of *WUS* on *TPPJ* expression. This is supported by an *in silico*  
91 analysis which predicts multiple, canonical *WUS* binding sites in the sequence upstream of the  
92 *TPPJ* coding sequence (*TPPJ*<sup>*WUS*</sup>, Fig. 3a)<sup>10,15-17</sup>. *WUS* is a bifunctional transcription factor,  
93 which was found to both activate and repress gene expression<sup>7</sup>. To understand if *WUS* directly

94 controls *TPPJ*, we performed *in vivo* transactivation assays. These show that WUS activates  
95 reporter gene expression when using a 2865 bp *TPPJ* 5' sequence, containing 17 putative  
96 *TPPJ*<sup>WUS</sup> sites (Fig. 3a). Progressive deletion of the *TPPJ* 5' sequence results in a reduction of  
97 reporter gene activation, suggesting an additive effect of the individual *TPPJ*<sup>WUS</sup> sites (#1-6; Fig.  
98 3a, 3b). We confirmed the direct binding of WUS to three distinct regions of the *TPPJ* promoter  
99 (I, II, and III, Fig. 3c-e, Fig. S10) by Chromatin immunoprecipitation (ChIP) coupled to PCR  
100 using a specific antibody against WUS (Fig. S11), while all other regions did not indicate  
101 binding (Fig. S10, Fig. S12). We observed enrichment of WUS binding to *TPPJ*<sup>WUS</sup> elements up  
102 to 0.67% of the input DNA in *clv3-7* and up to 0.75% of the input DNA in *clv3-10* apices, both  
103 of which express *WUS* at high levels in comparison to input DNA from wild-type apices, where  
104 *WUS* is expressed in only a few cells and input DNA from leaves, with no WUS (Fig. 3c-e; Fig.  
105 S10). Lastly, electrophoretic mobility shift assays (EMSA) confirm *in vitro* binding of WUS to  
106 the investigated sequences (I, II 1-3, III 1-3; Fig. 3f). In summary, we demonstrate that seven out  
107 of 17 putative *TPPJ*<sup>WUS</sup> sites are directly targeted by WUS *in vivo*.

108 To further assess the role of *TPPJ* at the SAM we used an artificial miRNA (*amiRTPPJ*)  
109 approach to downregulate *TPPJ* (*35S:amiRTPPJ*) (Fig. S13). Similar to a *tpj* T-DNA insertion  
110 mutant, plants overexpressing either of two versions of an *amiRTPPJ* (V1, V2) flower  
111 significantly earlier in both LD and SD (*35S:amiRTPPJ*, Fig. S14, Table S1). *MLI* expression  
112 specifically and stably localizes to the epidermis (L1) throughout the investigated developmental  
113 stages (Fig. S15). *MLI:amiRTPPJ* plants reduce *TPPJ* expression in L1 (arrowheads in Fig.  
114 S16), have smaller SAMs and flower significantly earlier in LD and SD (Fig. 4a-c, Fig. S17,  
115 S18, Table S1), while the level of *TPPJ* reduction is proportional to the acceleration of flowering  
116 (Fig. 4b and c, Fig. S13, Table S1). To date there are no reports that mutants in meristem

117 maintenance genes are affected in their flowering time. We found that plants mutant for *CLV3*  
118 are late flowering (Fig. 4c, Table S1). However, when *ML1:amiRTPPJ* is introgressed into either  
119 the *clv3-7* or *clv3-10* background, the late flowering phenotype of the mutant plants is restored to  
120 wild type (Fig. 4c, Fig. S18, Table S1), suggesting that *TPPJ* expression in the epidermis is also  
121 necessary for the late flowering phenotype of *clv3*. Hence, the early flowering of  
122 *ML1:amiRTPPJ* in a wild-type background is due to a reduction of *TPPJ* expression in L1 in its  
123 endogenous expression domain. In addition, other prominent morphological defects of *clv3-10*  
124 such as fasciated stems and enormous inflorescence SAMs are visibly reduced in the presence of  
125 *ML1:amiRTPPJ* (Fig. S18). *CLV3* expression increases to much higher levels in *ML1:amiRTPPJ*  
126 than in plants overexpressing *TPPJ* (Fig. 4d), suggesting an active role of the T6P pathway in the  
127 outer SAM layer with regard to stem cell maintenance. In addition, *WUS* is induced (Fig. 4d, Fig.  
128 S19), indicating uncoupling of the WUS/CLV feedback loop, consistent with our findings with  
129 altered T6P signaling at the SAM (Fig. 1d, Fig. 2f).

130 Since the T6P pathway influences the age pathway at the SAM<sup>4</sup>, we analyzed mature  
131 miR156 as well as the expression of *SPL3*, *SPL4*, *SPL5*, *SPL9* and *SPL15*, all associated with  
132 floral transition in general<sup>18,19</sup> (Fig. S20, Table S1). We found a strong reduction of mature  
133 miR156 levels correlating with lower *TPPJ* expression in *ML1:amiRTPPJ*, and corresponding  
134 increased expression of *SPL3*, *SPL4*, *SPL5*, and *SPL9* (Fig. 4e). In line, miR156 abundance was  
135 highly increased in *TPPJ* overexpressing plants, while the corresponding *SPLs* were  
136 downregulated (Fig. 4e). However, expression of *SPL15*, previously described to be mainly  
137 responsible for integrating the aging stimulus into the regulation of the floral onset<sup>20</sup>, was not  
138 differentially expressed in either of the transgenic lines (Fig. S21). In addition, we found miR156  
139 levels significantly increased in *clv3-10* mutant apices (Fig. 4f). In response, the levels of *SPL3*,

140 *SPL5*, and *SPL9* were reduced in line with the late flowering phenotype of the mutant. In contrast  
141 to what would be expected, we found more *SPL4* in apices of the late flowering *clv3-10* (Fig. 4f).  
142 Higher order lines from *spl3*, *spl4* and *spl5* deletion mutant plants are significantly later  
143 flowering in all lines with *spl4* (Fig. S20, Table S1). This argues for an important role of *SPL4* in  
144 inducing flowering. *SPL4*, similar to *SPL3*, *SPL5* and *SPL9*, is induced at the wild-type SAM at  
145 floral transition<sup>21</sup>. However, it is expressed in the very center of the SAM, in a domain largely  
146 overlapping with the WUS protein domain<sup>5,17,20,22</sup>, while *SPL3*, *SPL5*, and *SPL9* are expressed at  
147 the periphery of the SAM and in the vasculature of young leaves<sup>5,20</sup>. This might denote a direct  
148 regulation of *SPL4* by WUS, which would explain increased *SPL4* in the *clv3* mutant  
149 background (Fig. 4f) and the previously identified partially miR156-dependent regulation of the  
150 *SPLs* by the T6P pathway<sup>4</sup>. Indeed, we identified a larger number of potential *SPL4*<sup>WUS</sup> sites  
151 upstream of the *SPL4* coding sequence when compared to the 5' intergenic regions of the other  
152 *SPLs* (Fig. S22). However, this finding also suggests that additional players downstream of  
153 CLV3 are important for the onset of flowering, which cannot be bypassed by an otherwise  
154 inductive *SPL4* (Fig. 4f). Since carbohydrate status regulates timing of the floral transition<sup>4</sup>, it is  
155 interesting that T6P signaling also directly influences the re-organisation of the SAM during the  
156 floral transition (Fig. 4g). Given the ubiquitous nature of carbohydrate signaling and the large-  
157 scale change in sink-source relationships within the plants<sup>23</sup>, it will be interesting to determine if  
158 this regulatory mechanism is widely present in the plant kingdom.

159



## 160 **Methods**

### 161 **Materials and Methods**

#### 162 Plant material and growth conditions

163 All *Arabidopsis thaliana* plants used for this study are of the Columbia accession (Col-0).  
164 The lines *clv3-7*<sup>24</sup>, *clv3-10*<sup>25</sup>, *35S:amiRTPS1*, *CLV3:TPS1*<sup>4</sup>, and *WUS:WUS:GFP*<sup>22</sup> have been  
165 described previously as indicated. Plants were grown in controlled growth chambers at 22°C in  
166 long day (LD, 16h light/8h dark) or short day (SD, 8h dark/16h light) conditions with a light  
167 intensity of approximately 160  $\mu\text{mol}/\text{m}^2\text{s}^{-1}$  and a relative humidity of 60-65%. Controlled  
168 induction of flowering was performed using a previously described shift protocol<sup>21</sup>.

#### 169 Phenotypic analysis

170 Flowering time was defined as days to flowering (DTF), recorded when shoots were 0.5 cm  
171 high (bolting), and by scoring the total leaf number (TLN). The TLN is the sum of rosette leaves  
172 (RLN, rosette leaf number) and cauline leaves (CLN, cauline leaf number) per plant (Table S1).  
173 On average 20 plants of each genotype were analyzed in one experiment. Plants were grown in  
174 the conditions described above, and randomized every second day to avoid position effects.

#### 175 Generation of transgenic lines

176 Generally, Col-0 plants were transformed by the floral dip method<sup>26</sup>. The presence of the  
177 transgene was confirmed by PCR and independent, single-insertion, homozygous T3 plants  
178 were selected and used for all further studies. Oligonucleotides used for cloning are provided in  
179 Table S2, those used for genotyping are given in Table S3. To generate the *35S:TPPJ* and

180 *35S:TPS1* lines, the coding sequences of *TPPJ* (At5g65140) and *TPS1* (At1g78580) were amplified  
181 and introduced into the *pGEM<sup>®</sup>-Teasy* vector (Promega, Madison, Wisconsin, US), sub-cloned  
182 into the Gateway<sup>®</sup> entry vector *pJLBlue reverse*<sup>27</sup> (pVW275 and pVW099), and recombined into  
183 a *pGREEN-II*-based destination vector with 35S promoter (pVW279 – *TPPJ* and pVW161 – *TPS1*)  
184 using the Gateway<sup>®</sup> LR clonase II Enzyme mix (Invitrogen, Carlsbad, CA). Generation of artificial  
185 microRNAs targeting *TPPJ* (*ML1:amiRTPPJ* V1 and V2, *35S:amiRTPPJ* V1 and V2) was performed  
186 according to a previously published protocol<sup>28</sup> using the WMD3–Web MicroRNA Designer  
187 (<http://wmd3.weigelworld.org/cgi-bin/webapp.cgi>). The resulting *EcoRI/BamHI* fragment was  
188 sub-cloned into the Gateway<sup>®</sup> entry vector *pJLBlue reverse*<sup>27</sup> (V1: pVW498, V2: pVW499) and  
189 recombined using the Gateway<sup>®</sup> LR clonase II Enzyme mix (Invitrogen, Carlsbad, CA) into a  
190 *pGREEN-II*-based destination vector with either the *ML1* or *35S* promoter (V1: pVW507, V2:  
191 pVW508, V1: pVW504 V2: pVW505). Double mutant lines of *clv3* and *ML1:amiRTPPJ #1 and #2*  
192 were generated through crosses. All lines were propagated to the F4 generation and tested for  
193 homozygosity. To generate the *spl3*, *spl4*, *spl5*, knockout lines a modified version of the two  
194 single guided RNAs (2sgRNA) CRISPR/*Cas9* technology was used<sup>29,30</sup>. In brief, the NGG PAM  
195 recognition sites in the 5'UTR and last exon of *SPL3*, first exon and 3'UTR of *SPL4* and 5'UTR and  
196 3'UTR of *SPL5* were defined using the ATUM webtool (<https://www.atum.bio>). *pJF1033* vector,  
197 containing 2sgRNA scaffold, was used as a template. Resulting *BsaI* products were restriction  
198 cloned into the *pJF1031* binary vector<sup>30</sup>. Plants with homozygous deletions for *SPL3*, *SPL4* or  
199 *SPL5* were back-crossed to Col-0. Homozygous, *Cas9*-free lines were used for the experiments  
200 and to generate all higher order mutations, i.e. the *spl34*, *spl35*, *spl45* double as well as the  
201 *spl345* triple mutant lines.

## 202 RNA extraction and cDNA synthesis

203 Total RNA from homogenized rosette or dissected SAM samples was isolated by a  
204 phenol/chloroform extraction method using a modified TRIzol reagent with the following  
205 composition: phenol 38% (v/v), guanidine thiocyanate 0.8 M ammonium thiocyanate 0.4 M,  
206 sodium acetate 0.1 M pH 5.0, glycerol 5% (v/v), EDTA 5 mM pH 8.0, Na-lauroylsarcosine 0.5%  
207 (v/v). This was then followed by a sodium acetate precipitation to improve RNA purity. cDNA  
208 synthesis, preceded with removal of putative genomic DNA contamination with Dnase I Rnase-  
209 free (Ambion™/Thermo Fisher Scientific, Waltham, Massachusetts, US), was carried out using a  
210 SuperScript™IV Reverse Transcriptase Kit (Thermo Fisher Scientific, Waltham, Massachusetts,  
211 US) according to the manufacturer's instruction. For quantification of mature miR156 the  
212 respective stem-loop primers (Table S4) were added to the cDNA synthesis reaction (1:1 with  
213 oligo dT(18) primer) (Thermo Fisher Scientific, Waltham, Massachusetts, US) as previously  
214 described<sup>31</sup>.

## 215 RT-qPCR analysis

216 RT-qPCR analyses were performed with the ABI Prism 7900 HT fast real time PCR system  
217 (Applied Biosystems/Life Technologies, Darmstadt, Germany) using a Power SYBR® Green-PCR  
218 Master Mix (Applied Biosystems/Life Technologies, Darmstadt, Germany) in a 10 µl reaction  
219 volume for expression analyses and in a 5 µl volume for ChIP-PCRs. All oligos are listed in Table  
220 S4 and Table S5 (RT-qPCR and ChIP-PCR respectively). All data were analyzed using the SDS 2.4  
221 software (Applied Biosystems/Life Technologies, Darmstadt, Germany) applying the criteria  
222 described by Czechowski and co-workers (2004). cDNA quality was determined with primers

223 binding to the 3' and 5' regions of *GLYCERALDEHYDE-3-PHOSPHATE DEHYDROGENASE (GAPDH,*  
224 *At1g13440)*, and samples with Ct 5'GAPDH/Ct 3'GAPDH values > 1 were excluded from further  
225 analyses. Expression values were calculated by the comparative Ct method using the reference  
226 gene index (RGI) as previously described<sup>4</sup> and *POLYUBIQUITIN10 (UBQ10, At4g05320)* for figure  
227 3C and S14<sup>32</sup>. The primer sequences for the reference and analyzed genes are given in the Table  
228 S4.

#### 229 RNA *in situ* hybridization

230 Wax embedding was performed using an automated processor and embedding system  
231 (Leica EG1160, Solms, Germany). Sections of 8 µm thickness were prepared using a rotary  
232 microtome (Leica RM2265; Leica, Wetzlar, Germany).

233 Probes for RNA *in situ* hybridization were synthesized using the DIG RNA Labeling Kit  
234 (Roche, Mannheim, Germany). For this the ORFs of the target genes were cloned into the  
235 pGEM®-T Easy vector (Promega, Madison, Wisconsin, US) as a template according to  
236 manufactures instructions (oligonucleotides and construct IDs listed in the Table S6) and the  
237 sense and antisense RNA probes were synthesized using T7 and SP6 polymerases, respectively.  
238 RNA *in situ* hybridizations were carried out as previously described<sup>4</sup>. The final sections were  
239 imaged with an Olympus BX-61 microscope equipped with a DC View II digital camera (Olympus  
240 Europa SE & Co, Hamburg, Germany).

#### 241 Chromatin immunoprecipitation (ChIP)

242 For ChIP-PCR, 100 apices per biological replicate (Col-0, *clv3-7* and *clv3-10*) were collected  
243 and snap frozen in liquid N<sub>2</sub>. Samples were fixed in 1% (v/v) formaldehyde buffer (10 mM

244 sodium phosphate buffer, pH 7; 50 mM NaCl; 100 mM sucrose) under vacuum. ChIP was  
245 performed as previously described<sup>33</sup> with modifications: Antibody incubation (anti-WUS; AS11  
246 1759; Agrisera) was extended to o/n at 4°C and incubation with Agarose beads (Protein A-  
247 Agarose; sc-2001; Santa Cruz Biotechnology) to 6 h at 4°C. Immunoprecipitated DNA was  
248 analyzed by RT-qPCR assay. Data were analyzed using the SDS 2.4 software (Applied  
249 Biosystems/Life Technologies, Darmstadt, Germany). Ct values of *TPPJ* promoter regions were  
250 normalized to the Ct value of a region within the *UBQ10* promoter. The % of enrichment was  
251 calculated as relative to the input expression of the individual *TPPJ* promoter regions. The  
252 following controls were performed: ChIP on 100 apices of Col-0, *clv3-7* and *clv3-10* omitting  
253 addition of AB and ChIP on 1.5 g of Col-0, *clv3-7* and *clv3-10* leaves (Fig. S. 10). Please note that  
254 in contrast to the input samples there was no amplification in any of the other ChIP control  
255 samples. Oligonucleotides are listed in the Table S5.

#### 256 Transactivation assay

257 For the effector construct line, the *WUS* (At2g17950) coding sequence was PCR amplified  
258 using the Phusion High-Fidelity DNA Polymerase (Thermo Fisher Scientific, Waltham,  
259 Massachusetts, US). The resulting fragment was cloned into the pGEM<sup>®</sup>-Teasy vector (Promega,  
260 Madison, Wisconsin, US) (pVW310), sub-cloned into the Gateway<sup>®</sup> entry vector pJLBlue  
261 reverse<sup>27</sup> (pMML056) and recombined using the Gateway<sup>®</sup> LR clonase II Enzyme mix  
262 (Invitrogen, Carlsbad, CA) into a Gateway<sup>®</sup> destination vector with 35S promoter (pMDC32)  
263 (pMML058). For the reporter gene constructs, designated regions of the 5' *TPPJ* region were  
264 amplified with specific primers (Table S2) using the Phusion High-Fidelity DNA Polymerase  
265 (Thermo Fisher Scientific, Waltham, Massachusetts, US). The resulting *KpnI/AcyI* fragment was

266 sub-cloned into the Gateway<sup>®</sup> entry vector pMDC162 to obtain GUS gene fusions (Table S2).  
267 The 35Somega:LUC-NOS plasmid containing the LUC gene driven by the 35S promoter was used  
268 as an internal control. Col-0 protoplasts were isolated from leaves of 4-week-old plants and  
269 transfected by a modified polyethylene glycol method<sup>34</sup>. The transfected cells were incubated  
270 for 20 h at 22°C in the light (100  $\mu\text{mol}/\text{m}^2\text{s}^{-1}$ ), harvested by centrifugation at 100 g for 2 min,  
271 and then lysed<sup>35</sup>. Luciferase activity was measured with a luciferase assay kit (Promega,  
272 Madison, Wisconsin, US) according to the manufacturer's instruction, and GUS activity was  
273 determined according to a previously described protocol<sup>35</sup>.

#### 274 Electrophoretic mobility shift assay (EMSA)

275 *WUS* coding sequence without STOP codon was PCR amplified using the Phusion DNA  
276 polymerase (New England Biolabs). The resulting fragment was sub-cloned into the Gateway<sup>®</sup>  
277 entry vector pDONR207 (pMML059) and recombined into a Gateway<sup>®</sup> destination vector with  
278 35S promoter (pDEST24) using the Gateway<sup>®</sup> LR clonase II Enzyme mix (Invitrogen, Carlsbad,  
279 CA) resulting in pMML063. The plasmid was transformed into the *Escherichia coli* strain Rosetta  
280 plysS and the protein production was induced with 1 mM isopropyl  $\beta$ -D-1-  
281 thiogalactopyranoside at 30°C over-night. Bacterial cell lysis was performed by sonication (1x, 5  
282 sec, 20% power, 4 cycles, Sonoplus Hd 2070 Sonicator, Badelin, Berlin, Germany) preceded by  
283 incubation on ice for 20 min in the freshly prepared protein extraction buffer (20 mM Na-  
284 phosphate buffer, pH 7.4; 0.5 M NaCl; 1 mM phenylmethylsulfonyl fluoride; 1 mM  
285 Ethylenediaminetetraacetic acid; 1 tablet of cComplete<sup>™</sup> Protease Inhibitor Cocktail (Merck,  
286 Darmstadt, Germany) per 10 ml of the buffer). For the EMSA 2  $\mu\text{g}$  of protein (crude extract,  
287 determined by Pierce<sup>™</sup> BCA Protein Assay Kit, Thermo Fisher Scientific, Waltham,

288 Massachusetts, US) was used. The EMSA was performed using 5'-IRDey-682-labeled, double-  
289 stranded oligos of 50 bp spanning the putative WUS binding sites in the 5' regulatory region of  
290 *TPPJ* (Table S7). Binding reactions were carried out using the Odyssey® EMSA Kit (LI-COR®)  
291 according to the manufacturer's instruction with a competitor to probe ratio of 1:200. Results  
292 were visualized using an Oddysey Infrared Imaging System (Li-Cor, Lincoln, NE).

### 293 Confocal microscopy

294 Apices from developmental series of Col-0 TCSn:GFP cytokinin reporter line lines were  
295 excised using a diamond knife leaving a stalk of stem tissue. This stalk was used to fix the  
296 sample for imaging in a droplet of 0.1% agar covered with Perfluorodecalin (F2 Chemicals,  
297 Lancashire, UK) on a glass slide. A Leica SP8 confocal laser scanning system equipped with a  
298 M6000B-CS microscopy stage, an Argon laser (65 mV), and a 40x water immersion HCX APO  
299 objective was used to image SAMs with following settings: Laser output power 20%; GFP  
300 Excitation (green): wavelength 488 nm / emission detection channel 3: 495 - 520 nm, gain PMT  
301 800 V; plastid auto-fluorescence (blue) emission detection channel 4: 700 - 800 nm, gain PMT  
302 ~500 V; scan speed 600 Hz in xyz bi-directional scanning mode with a z-stack distance of  
303 approx. 10 µm. Offset = 0; pixel dimension: 1024 × 1024. To visualize the differences in GFP  
304 presence middle sections of representative SAMs were extracted from z-stacks using the Fiji  
305 software package<sup>36</sup>, version 2.0.0-rc-69/1.52 max-intensity Z-Projection function.

### 306 Statistical consideration

307 Statistical significance of flowering time and RT-qPCR data was analyzed both, by one-way  
308 ANOVA (Analysis of Variance) with Tukey' Post Hoc HSD (Honestly Significant Difference) based

309 on Tukey-Kramer correction (P value <0.05) and two-tailed Student's *t*-test. Significance of the  
310 data was marked with asterisks (\*) based on the following criteria: P ≤ 0,05: \*, P ≤ 0,01: \*\*, P ≤  
311 0,001: \*\*\*. The presented statistical data are based on: flowering time experiments – min. 20  
312 plants of each genotype; SAM area measurements – longitudinal middle section through min. 7  
313 individual SAMs; *WUS* and *CLV3* expression domain size and distance to the summit –  
314 longitudinal middle section through min. 6 individual SAMs RT-qPCR – min. three biological  
315 replicates; Transactivation assay – 6 biological replications; ChIP – 3 biological replications.

## 316 **Data availability**

317 All data supporting the findings of this study are available in the main text or the  
318 Supplementary Information. All biological materials used in this study are available from the  
319 corresponding author on reasonable request. Source data are provided with this paper.

## 320 **References and Notes**

- 321 1 Kwiatkowska, D. Flowering and apical meristem growth dynamics. *J Exp Bot* **59**,  
322 187-201, doi:10.1093/jxb/erm290 (2008).
- 323 2 Srikanth, A. & Schmid, M. Regulation of flowering time: all roads lead to Rome.  
324 *Cellular and molecular life sciences : CMLS* **68**, 2013-2037, doi:10.1007/s00018-011-  
325 0673-y (2011).
- 326 3 Ponnu, J. *et al.* The Trehalose 6-Phosphate Pathway Impacts Vegetative Phase  
327 Change in *Arabidopsis thaliana*. *Plant J*, doi:10.1111/tpj.14965 (2020).
- 328 4 Wahl, V. *et al.* Regulation of flowering by trehalose-6-phosphate signaling in  
329 *Arabidopsis thaliana*. *Science (New York, N.Y.)* **339**, 704-707,  
330 doi:10.1126/science.1230406 (2013).
- 331 5 Olas, J. J. *et al.* Nitrate acts at the *Arabidopsis thaliana* shoot apical meristem to  
332 regulate flowering time. *New Phytol* **223**, 814-827, doi:10.1111/nph.15812 (2019).
- 333 6 Fichtner, F. & Lunn, J. E. The Role of Trehalose 6-Phosphate (Tre6P) in Plant  
334 Metabolism and Development. *Annu Rev Plant Biol*, doi:10.1146/annurev-arplant-  
335 050718-095929 (2021).



- 336 7 Pfeiffer, A., Wenzl, C. & Lohmann, J. U. Beyond flexibility: controlling stem cells in an  
337 ever changing environment. *Curr Opin Plant Biol* **35**, 117-123,  
338 doi:10.1016/j.pbi.2016.11.014 (2017).
- 339 8 Kinoshita, A. *et al.* Regulation of shoot meristem shape by photoperiodic signaling  
340 and phytohormones during floral induction of Arabidopsis. *Elife* **9**,  
341 doi:10.7554/eLife.60661 (2020).
- 342 9 Brand, U., Grunewald, M., Hobe, M. & Simon, R. Regulation of CLV3 expression by  
343 two homeobox genes in Arabidopsis. *Plant Physiol* **129**, 565-575,  
344 doi:10.1104/pp.001867 (2002).
- 345 10 Leibfried, A. *et al.* WUSCHEL controls meristem function by direct regulation of  
346 cytokinin-inducible response regulators. *Nature* **438**, 1172-1175,  
347 doi:10.1038/nature04270 (2005).
- 348 11 Snipes, S. A. *et al.* Cytokinin stabilizes WUSCHEL by acting on the protein domains  
349 required for nuclear enrichment and transcription. *PLoS Genet* **14**, e1007351,  
350 doi:10.1371/journal.pgen.1007351 (2018).
- 351 12 Pfeiffer, A. *et al.* Integration of light and metabolic signals for stem cell activation at  
352 the shoot apical meristem. *Elife* **5**, doi:10.7554/eLife.17023 (2016).
- 353 13 Zurcher, E. *et al.* A robust and sensitive synthetic sensor to monitor the  
354 transcriptional output of the cytokinin signaling network in planta. *Plant Physiol*  
355 **161**, 1066-1075, doi:10.1104/pp.112.211763 (2013).
- 356 14 Brand, U., Fletcher, J. C., Hobe, M., Meyerowitz, E. M. & Simon, R. Dependence of stem  
357 cell fate in Arabidopsis on a feedback loop regulated by CLV3 activity. *Science (New*  
358 *York, N.Y.)* **289**, 617-619, doi:10.1126/science.289.5479.617 (2000).
- 359 15 Lohmann, J. U. *et al.* A molecular link between stem cell regulation and floral  
360 patterning in Arabidopsis. *Cell* **105**, 793-803, doi:10.1016/s0092-8674(01)00384-1  
361 (2001).
- 362 16 Sloan, J. *et al.* Structural basis for the complex DNA binding behavior of the plant  
363 stem cell regulator WUSCHEL. *Nat Commun* **11**, doi:ARTN 2223  
364 10.1038/s41467-020-16024-y (2020).
- 365 17 Yadav, R. K. *et al.* WUSCHEL protein movement mediates stem cell homeostasis in  
366 the Arabidopsis shoot apex. *Genes Dev* **25**, 2025-2030, doi:10.1101/gad.17258511  
367 (2011).
- 368 18 Hyun, Y., Richter, R. & Coupland, G. Competence to Flower: Age-Controlled  
369 Sensitivity to Environmental Cues. *Plant Physiol* **173**, 36-46,  
370 doi:10.1104/pp.16.01523 (2017).
- 371 19 Xie, Y. *et al.* FHY3 and FAR1 Integrate Light Signals with the miR156-SPL Module-  
372 Mediated Aging Pathway to Regulate Arabidopsis Flowering. *Mol Plant* **13**, 483-498,  
373 doi:10.1016/j.molp.2020.01.013 (2020).
- 374 20 Hyun, Y. *et al.* Multi-layered Regulation of SPL15 and Cooperation with SOC1  
375 Integrate Endogenous Flowering Pathways at the Arabidopsis Shoot Meristem. *Dev*  
376 *Cell* **37**, 254-266, doi:10.1016/j.devcel.2016.04.001 (2016).
- 377 21 Schmid, M. *et al.* Dissection of floral induction pathways using global expression  
378 analysis. *Development* **130**, 6001-6012, doi:10.1242/dev.00842 (2003).
- 379 22 Daum, G., Medzihradsky, A., Suzaki, T. & Lohmann, J. U. A mechanistic framework  
380 for noncell autonomous stem cell induction in Arabidopsis. *Proc Natl Acad Sci U S A*  
381 **111**, 14619-14624, doi:10.1073/pnas.1406446111 (2014).

- 382 23 Fernie, A. R. *et al.* Synchronization of developmental, molecular and metabolic  
383 aspects of source-sink interactions. *Nat Plants* **6**, 55-66, doi:10.1038/s41477-020-  
384 0590-x (2020).
- 385 24 Wisman, E., Cardon, G. H., Fransz, P. & Saedler, H. The behaviour of the autonomous  
386 maize transposable element En/Spm in *Arabidopsis thaliana* allows efficient  
387 mutagenesis. *Plant Mol Biol* **37**, 989-999, doi:10.1023/a:1006082009151 (1998).
- 388 25 Forner, J., Pfeiffer, A., Langenecker, T., Manavella, P. A. & Lohmann, J. U. Germline-  
389 transmitted genome editing in *Arabidopsis thaliana* Using TAL-effector-nucleases.  
390 *PLoS One* **10**, e0121056, doi:10.1371/journal.pone.0121056 (2015).
- 391 26 Clough, S. J. & Bent, A. F. Floral dip: a simplified method for *Agrobacterium*-mediated  
392 transformation of *Arabidopsis thaliana*. *Plant J* **16**, 735-743, doi:10.1046/j.1365-  
393 313x.1998.00343.x (1998).
- 394 27 Mathieu, J., Warthmann, N., Kuttner, F. & Schmid, M. Export of FT protein from  
395 phloem companion cells is sufficient for floral induction in *Arabidopsis*. *Curr Biol* **17**,  
396 1055-1060, doi:10.1016/j.cub.2007.05.009 (2007).
- 397 28 Schwab, R. *et al.* Specific effects of microRNAs on the plant transcriptome. *Dev Cell* **8**,  
398 517-527, doi:10.1016/j.devcel.2005.01.018 (2005).
- 399 29 Wang, Z. P. *et al.* Egg cell-specific promoter-controlled CRISPR/Cas9 efficiently  
400 generates homozygous mutants for multiple target genes in *Arabidopsis* in a single  
401 generation. *Genome Biol* **16**, 144, doi:10.1186/s13059-015-0715-0 (2015).
- 402 30 Ruf, S. *et al.* High-efficiency generation of fertile transplastomic *Arabidopsis* plants.  
403 *Nat Plants* **5**, 282-289, doi:10.1038/s41477-019-0359-2 (2019).
- 404 31 Varkonyi-Gasic, E., Wu, R., Wood, M., Walton, E. F. & Hellens, R. P. Protocol: a highly  
405 sensitive RT-PCR method for detection and quantification of microRNAs. *Plant*  
406 *Methods* **3**, 12, doi:10.1186/1746-4811-3-12 (2007).
- 407 32 Czechowski, T., Bari, R. P., Stitt, M., Scheible, W. R. & Udvardi, M. K. Real-time RT-PCR  
408 profiling of over 1400 *Arabidopsis* transcription factors: unprecedented sensitivity  
409 reveals novel root- and shoot-specific genes. *Plant J* **38**, 366-379,  
410 doi:10.1111/j.1365-313X.2004.02051.x (2004).
- 411 33 Kaufmann, K. *et al.* Chromatin immunoprecipitation (ChIP) of plant transcription  
412 factors followed by sequencing (ChIP-SEQ) or hybridization to whole genome arrays  
413 (ChIP-CHIP). *Nat Protoc* **5**, 457-472, doi:10.1038/nprot.2009.244 (2010).
- 414 34 Wu, F. H. *et al.* Tape-*Arabidopsis* Sandwich - a simpler *Arabidopsis* protoplast  
415 isolation method. *Plant Methods* **5**, 16, doi:10.1186/1746-4811-5-16 (2009).
- 416 35 Yoo, S. D., Cho, Y. H. & Sheen, J. *Arabidopsis* mesophyll protoplasts: a versatile cell  
417 system for transient gene expression analysis. *Nat Protoc* **2**, 1565-1572,  
418 doi:10.1038/nprot.2007.199 (2007).
- 419 36 Schindelin, J. *et al.* Fiji: an open-source platform for biological-image analysis. *Nat*  
420 *Methods* **9**, 676-682, doi:10.1038/nmeth.2019 (2012).
- 421

## 422 Acknowledgments

423 The authors wish to thank all members of the Wahl group for fruitful discussions, T. Seibert, M.  
424 Schmid and P. Wigge for critical reading of the manuscript, D. Walter for input on statistical  
425 analyses, K. Kontbay, M. Liang and J. Van Dingenen for their support with the *spl*  
426 CRISPR/*Cas9* deletion lines, M. Molochko for sharing the *35Somega:LUC-NOS* plasmid, J.  
427 Forner for providing the *pJF1031* and *pJF1033* plasmids.

428 **Funding:** Work in the Wahl group was supported by the BMBF (SolaMI, 031B0191), the DFG  
429 (SPP1530: WA3639/1-2, 2-1), and the Max Planck Society.

#### 430 **Authors contribution**

431 VW conceived and designed the experiments and prepared the figures with contributions from  
432 MML. VW and MML analyzed the data and wrote the manuscript. MML, KF, AK, and VW  
433 performed all essential experiments, i.e. VW generated most of the lines used, except for  
434 *ML1:amiRTPPJ* (KF), the *spl* CRISPR/*Cas9* deletion lines (MML), and all crosses thereof  
435 (MML). MML performed all transactivation assays, ChIP-PCRs, EMSAs and qPCR analyses.  
436 MML, AK, KF, CA, and VW analyzed SAM sizes and scored flowering time. RNA *in situ*  
437 hybridizations were performed by VW, AK, KF and MML. FK and VW took the confocal  
438 images. All authors have read and commented on the text and figures within this manuscript.

#### 439 **Competing interests**

440 Authors declare no competing interests.

#### 441 **Additional Information**

442 Supplementary Information: Figures S1-S22, Tables S1-S7, References (1-3).

443

444 **Figures captions**

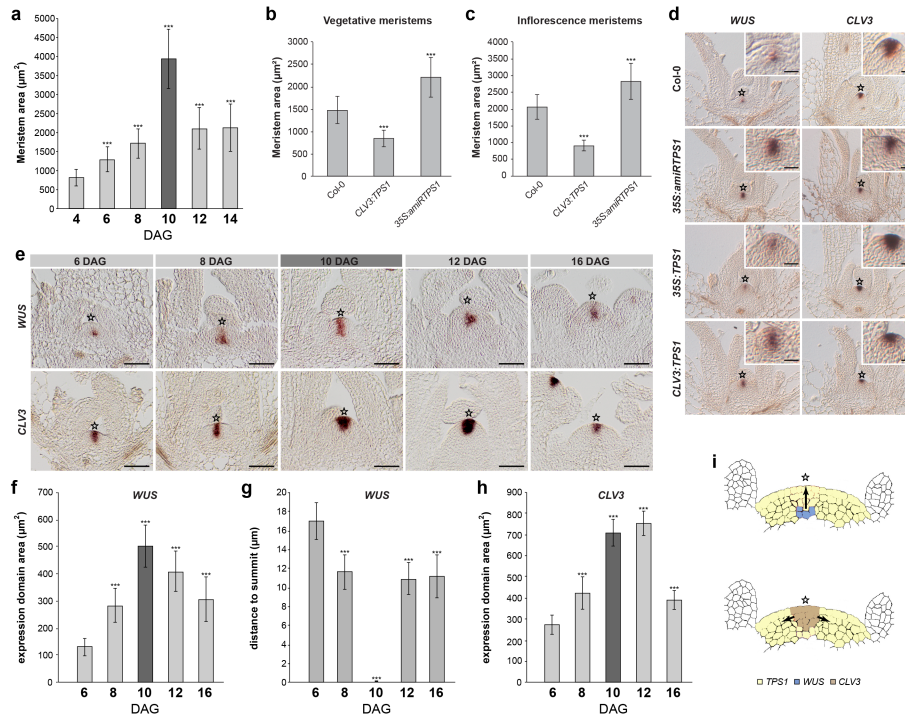

445

446 **Fig. 1. The T6P pathway impacts SAM size during development.** (a) SAM area throughout  
 447 development. (b) Vegetative and (c) inflorescence SAM size of *CLV3:TPS1* and *35S:amiRTPS1*  
 448 lines. (d) *WUS* and *CLV3* expression by RNA *in situ* hybridisation on longitudinal sections  
 449 through *Col-0*, *35S:amiRTPS1*, *35S:TPS1* and *CLV3:TPS1* SAMs of LD-grown plants 8 days  
 450 after germination. (e) *WUS* and *CLV3* expression by RNA *in situ* hybridisation in vegetative (6  
 451 and 8 DAG), transition (10 DAG, dark grey) and inflorescence SAMs (12 and 16 DAG) of LD-  
 452 grown *Col-0* plants. (f) *WUS* expression domain sizes, (g) *WUS* expression domain distance to  
 453 SAM summit, and (h) *CLV3* expression domain area, in vegetative, transition (dark grey) and  
 454 inflorescence SAMs of LD-grown wild-type plants. (i) Schematic picture of *WUS*, *CLV3* and  
 455 *TPS1* expression dynamics with arrows indicating direction of increasing expression domain at  
 456 transition. Error bars denote s.d.; significance was calculated based on one-way Anova and a  
 457 Student's *t*-test, \*\*\**P*<0.001. ☆ indicates SAM summit. Scale bars 25µm.

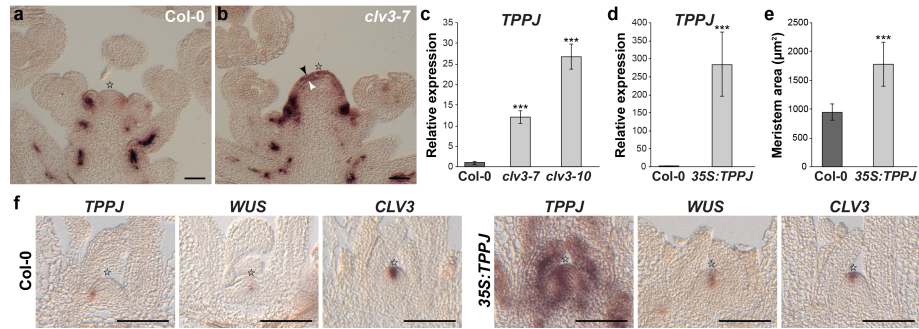

458

459 **Fig. 2. *WUS* and *CLV3* expression in response to changes of *TPPJ* in the SAM. (a, b) *TPPJ***

460 expression by RNA *in situ* hybridisation on longitudinal sections through inflorescence SAMs of

461 Col-0 (a), and *clv3-7* (b), and by qRT-PCR in apices collected from *clv3-7*, *clv3-10* (c), and

462 *35S:TPPJ* (d) plants. (e, f) SAM size of plants overexpressing *TPPJ* (e), expression of *TPPJ*,

463 *WUS*, *CLV3* by RNA *in situ* hybridization (f). Error bars denote s.d.; significance calculated by

464 one-way Anova and Student's *t*-test, \*\*\**P*<0.001. ☆ indicates SAM summit. Scale bars are

465 50 μm.

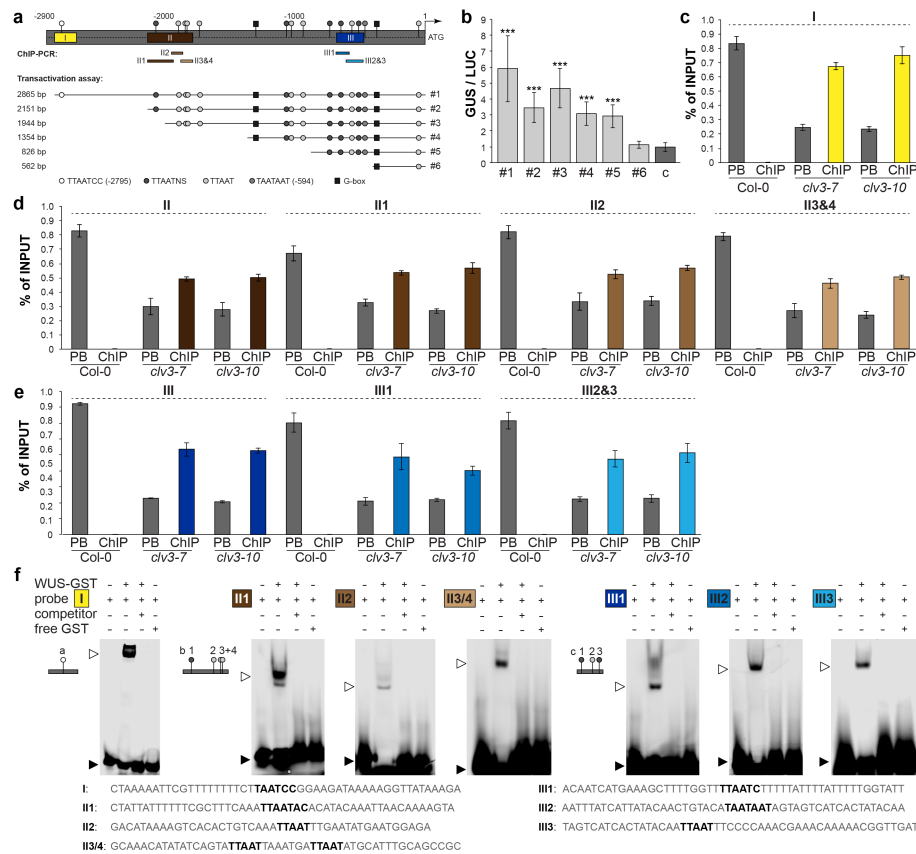

466

467 **Fig. 3. WUS directly regulates *TPPJ* in the SAM.** (a) Overview of *TPPJ* 5' regulatory region

468 with putative WUS binding sites (●, ■), position of ChIP-PCR amplicons corresponding to the

469 results shown in (c-e). Boxes marked with I, II, and III indicate 5' *TPPJ* regions with in total

470 seven core WUS binding sites – I: -2795 – -2789 bp, II: -2073 – -1830 bp, and III: -652 – -564

471 bp. Sequence location and lengths used in (b) indicated with #1-6. (b) Protoplast transactivation

472 assay showing activation of the GUS reporter when coupled to the regions indicated in (a),

473 relative to LUC activity. c indicates untransformed control. (c-e) Enrichment of (c) region I, (d)

474 region II, and (e) region III as indicated in (a) measured by ChIP-PCR relative to the input. PB –

475 post binding fraction. (f) EMSA for WUS binding to the indicated regions (a, I-III). Error bars

476 denote s.d.; significance based on one way Anova and Student's *t*-test, \*\*\**P* < 0.001. Scale bars

477 are 50μm.

478

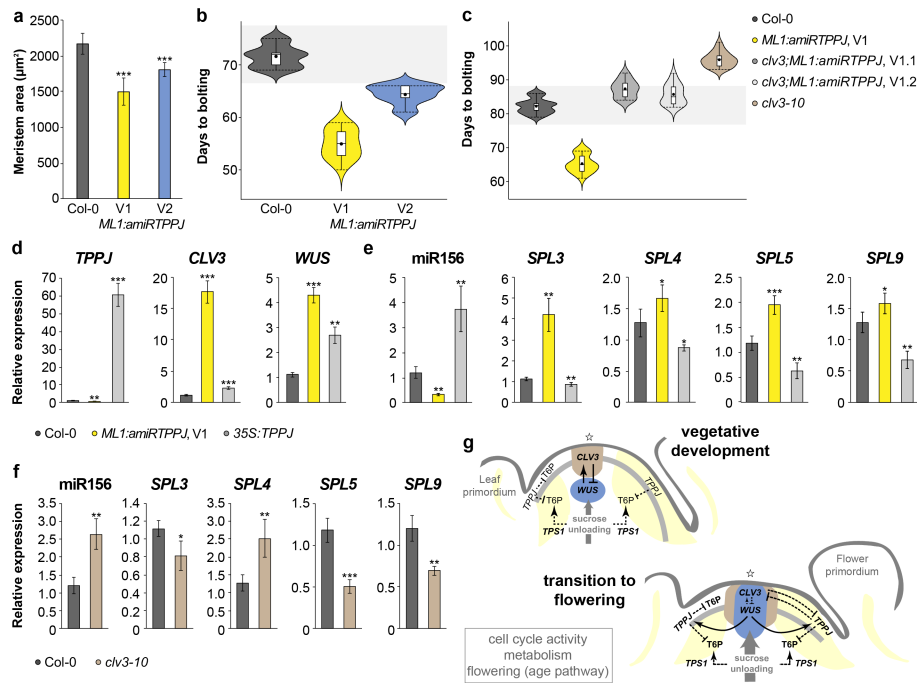

479

480

481 **Fig. 4. The role of TPPJ in the outer SAM layer.** (a) Meristem area of Col-0, *ML1:amiRTPPJ*

482 V1 and V2, (b-c) Flowering time of *ML1:amiRTPPJ* (b) and *clv3-10;ML1:amiRTPPJ* (c)

483 shown as days to bolting (a, c) relative to the wild type. V1 and V2 indicate two independent

484 versions of artificial microRNAs designed to target *TPPJ* transcript. (d, e) Relative expression

485 of *SPL* genes, mature miR156 (d), and *TPPJ*, *CLV3*, and *WUS* (e) in SD-grown *ML1:amiRTPPJ*

486 and *35S:TPPJ* at 40 days after germination. (f) Relative expression of mature miR156 and *SPL*

487 genes in SD-grown *clv3-10* at 40 days after germination. (g) Schematic model of vegetative and

488 transition SAM circuits. Error bars denote s.d.; significance calculated based on one way Anova

489 and Student's *t* test; \* $P < 0.05$ , \*\* $P < 0.01$ , \*\*\* $P < 0.001$ . ☆ indicates SAM summit.
